# Supplementary material for: Characterizing Intimate Partner Violence against Married Women in Ethiopia with Machine Learning
Source: Research Square preprint supplement (doi:10.21203/rs.3.rs-3035046/v1), 2023-06-12
Supplement: Supplementary file 1 [file 0c539df3c111631852c223b7.docx]

| The tuning parameters for each homogeneous ensemble machine learning algorithm are identified by Grid search for all experiments. | | | |
| --- | --- | --- | --- |
| Types of Algorithm | Hyper-parameter | Values | Description |
| Xgboost | n_estimators | [500, 1000, 1500] | Number of boosting iterations that will be performed |
| learning_rate | [0.01, 0.05, 0.08] | The step size of the gradient boosting algorithm |
| max_depth | [5, 10, 15, 20] | How deep each estimator is permitted to build a tree |
| num_leaves | [5, 10, 15, 20] | Maximum number of leaves in one tree |
| Cat Boost | iterations | [500, 1000, 1500] | Number of boosting iterations that will be performed |
| learning_rate | [0.01, 0.05, 0.08] | The step size of the gradient boosting algorithm |
| depth | [5, 10, 15, 20] | Maximum depth of a tree |
| l2_leaf_reg | [2, 10, 20] | The magnitude of the ridge regularization term |
| Light Gradient Boosting Machine | n_estimators | [500, 1000, 1500] | Number of boosting iterations that will be performed |
| learning_rate | [0.01, 0.05, 0.08] | The step size of the gradient boosting algorithm |
| max_depth | [5, 10, 15, 20] | Maximum depth of a tree |
| num_leaves | [5, 10, 15, 20] | Maximum number of leaves in one tree |
| min_data_in_leaf | [20, 50, 80] | Minimum number of samples in one leaf |
| min_child_weight | [0.01, 1, 5, 10] | The minimum Hessian sum in one leaf |
| Random Forest | n_estimators | 500, 1000, 1500] | Number of boosting iterations that will be performed |
| max_features | ['auto', 'sqrt', ‘log2’] | Number of features selected at random |
| max_depth | [5, 10, 15, 20] | The depth of each tree in the forest |
| min_samples_split | [5, 10, 15, 20] | Minimum number of leaves in one tree |
| min_samples_leaf | [10, 20, 30] | Minimum number of samples in one leaf |
